# Supplementary material for: Development of a Hamster Natural Transmission Model of SARS-CoV-2 Infection
Source: MDPI journal article supplement (doi:10.3390/v13112251), 2021-11-09
Supplement: s1 [file s1]

**Supplementary Table S1.** Scoring criteria for the subjective assessment of microscopic changes in lung and nasal cavity of hamsters infected with SARS-CoV-2.

| Location     | Lesion                                                                                                                                                    | Score 0<br>(normal) | Score 1<br>(minimal)                                                                    | Score 2<br>(mild)                                                                                                                        | Score 3<br>(moderate)                                                                                                                  | Score 4<br>(marked)                                                                                                        |
|--------------|-----------------------------------------------------------------------------------------------------------------------------------------------------------|---------------------|-----------------------------------------------------------------------------------------|------------------------------------------------------------------------------------------------------------------------------------------|----------------------------------------------------------------------------------------------------------------------------------------|----------------------------------------------------------------------------------------------------------------------------|
| Lung         | Airway epithelial degeneration/necrosis and/or inflammatory cell infiltration with or without exudates                                                    | None                | Occasional (1 or 2) airways affected; <b>up to 5% of slide affected</b>                 | Present in multiple airways; <b>up to 25% of airways affected</b>                                                                        | Present in multiple airways; <b>between 26–50% of airways affected</b>                                                                 | Present in multiple airways; <b>over 50% of airways affected</b>                                                           |
|              | Peri-airway inflammatory infiltrates (cuffing)                                                                                                            | None                | Occasional incomplete, or loosely formed cuffs; <b>up to 5% of slide affected</b>       | Numerous cuffs; predominantly incomplete and loosely formed with lesser well-formed complete cuffs; <b>up to 25% of airways affected</b> | Numerous cuffs; approximately half or more well-formed, and may have few broad, dense cuffs; <b>between 26–50% of airways affected</b> | Numerous cuffs; predominantly well-formed with numerous broad, dense cuffs; <b>over 50% of airways affected</b>            |
|              | Perivascular inflammatory infiltrates (cuffing)                                                                                                           | None                | Occasional incomplete, or loosely formed cuffs; <b>up to 5% of slide affected</b>       | Numerous cuffs; predominantly incomplete and loosely formed with lesser well-formed complete cuffs; <b>up to 25% of vessels affected</b> | Numerous cuffs; increased numbers are well-formed, and may have few broad, dense cuffs; <b>between 26–50% of vessels affected</b>      | Numerous cuffs; predominantly well-formed with numerous broad, dense cuffs; <b>over 50% of vessels affected</b>            |
|              | Alveolar walls/space infiltration by inflammatory cells, primarily neutrophils and macrophages; variable oedema/fibrin +/- type II pneumocyte hyperplasia | None                | Small numbers of foci affected within the parenchyma; <b>up to 5% of slide affected</b> | Increased frequency of foci; <b>between 6–25% of the slide affected</b>                                                                  | Multifocal coalescing or larger patches of parenchyma; <b>between 26–50% of the slide affected</b>                                     | Large areas of parenchyma; <b>over 50% of the slide affected</b>                                                           |
| Nasal cavity | Epithelial attenuation/ and necrosis in the mucosa                                                                                                        | None                | Occasional epithelial cell degeneration; <b>up to 5% of slide affected</b>              | Multifocal epithelial cell degeneration/necrosis; <b>between 6–25% of the slide affected</b>                                             | Multifocal, sometime coalescing areas of epithelial cell degeneration/; <b>between 26–50% of the slide affected</b>                    | Multifocally extensive to coalescing areas of epithelial cell degeneration/necrosis; <b>over 50% of the slide affected</b> |
|              | Presence of exudates within the nasal cavity lumen                                                                                                        | None                | Minimal presence of inflammatory cells; <b>up to 5% of slide affected</b>               | Mild exudation of degenerate epithelial and inflammatory cells; <b>between 6–25% of the slide affected</b>                               | Moderate exudation of degenerate epithelial and inflammatory cells; <b>between 26–50% of the slide affected</b>                        | Marked/severe exudation of degenerate epithelial and inflammatory cells; <b>over 50% of the slide affected</b>             |
